# Supplementary material for: Allosteric mechanism of signal transduction in the two-component system histidine kinase PhoQ
Source: eLife. 2021 Dec 14;10:e73336. doi: 10.7554/eLife.73336 (PMC8719878; doi:10.7554/eLife.73336)
Supplement: Figure 7—figure supplement 4—source data 1. [file elife-73336-fig7-figsupp4-data1.xlsx]

## Sheet: 2 state fit values
A213W_1'	S	1.65305
	KdP	0.000626954
	KSen	275.561
	KAK	0.54128
	KdK	0.0106733
	alpha	0.940471
'A213W_2'	S	1.65305
	KdP	0.000626954
	KSen	133.346
	KAK	0.54128
	KdK	0.0106733
	alpha	0.940471
'A225F'	S	1.65305
	KdP	0.000626954
	KSen	63.0972
	KAK	0.54128
	KdK	0.0106733
	alpha	0.940471
'E232A_1'	S	1.65305
	KdP	0.000626954
	KSen	0.00935879
	KAK	0.54128
	KdK	0.0106733
	alpha	13502.9
'E232A_2'	S	1.65305
	KdP	0.000626954
	KSen	5.25627
	KAK	0.54128
	KdK	0.0106733
	alpha	8.52391
'E232A_Gly7_260/261'	S	1.65305
	KdP	0.000626954
	KSen	6.11595
	KAK	0.54128
	KdK	0.0106733
	alpha	1.001
'E233A_1'	S	1.65305
	KdP	0.000626954
	KSen	7.41413
	KAK	0.54128
	KdK	0.0106733
	alpha	3.29875
'E233A_2'	S	1.65305
	KdP	0.000626954
	KSen	13.3239
	KAK	0.54128
	KdK	0.0106733
	alpha	1.27204
'E261F_1'	S	1.65305
	KdP	0.000626954
	KSen	9.18032
	KAK	0.54128
	KdK	0.0106733
	alpha	6.0603
'E261F_2'	S	1.65305
	KdP	0.000626954
	KSen	10.2654
	KAK	0.54128
	KdK	0.0106733
	alpha	2.17737
'E55A'	S	1.65305
	KdP	0.000626954
	KSen	15.7102
	KAK	0.54128
	KdK	0.0106733
	alpha	0.940471
'E55S'	S	1.65305
	KdP	0.000626954
	KSen	46.112
	KAK	0.54128
	KdK	0.0106733
	alpha	0.940471
'I207A'	S	1.65305
	KdP	0.000626954
	KSen	39.5701
	KAK	0.54128
	KdK	0.0106733
	alpha	0.940471
'I221F'	S	1.65305
	KdP	0.000626954
	KSen	45.0881
	KAK	0.54128
	KdK	0.0106733
	alpha	0.940471
'L210A'	S	1.65305
	KdP	0.000626954
	KSen	72.2585
	KAK	0.54128
	KdK	0.0106733
	alpha	0.940471
'L224A'	S	1.65305
	KdP	0.000626954
	KSen	60.6525
	KAK	0.54128
	KdK	0.0106733
	alpha	0.940471
'L224F'	S	1.65305
	KdP	0.000626954
	KSen	8.67292
	KAK	0.54128
	KdK	0.0106733
	alpha	0.940471
'L254A_1'	S	1.65305
	KdP	0.000626954
	KSen	199.484
	KAK	0.54128
	KdK	0.0106733
	alpha	1e-05
'L254A_2'	S	1.65305
	KdP	0.000626954
	KSen	155.065
	KAK	0.54128
	KdK	0.0106733
	alpha	1e-05
'L258A'	S	1.65305
	KdP	0.000626954
	KSen	149.303
	KAK	0.54128
	KdK	0.0106733
	alpha	1e-05
'N240A'	S	1.65305
	KdP	0.000626954
	KSen	21.9196
	KAK	0.54128
	KdK	0.0106733
	alpha	0.940471
'N255A'	S	1.65305
	KdP	0.000626954
	KSen	23.8175
	KAK	0.54128
	KdK	0.0106733
	alpha	1.28588
'N255A_Gly7_260/261'	S	1.65305
	KdP	0.000626954
	KSen	1.64824
	KAK	0.54128
	KdK	0.0106733
	alpha	1.001
'R236A'	S	1.65305
	KdP	0.000626954
	KSen	24.8182
	KAK	0.54128
	KdK	0.0106733
	alpha	0.940471
'R245F'	S	1.65305
	KdP	0.000626954
	KSen	18.0887
	KAK	0.54128
	KdK	0.0106733
	alpha	0.940471
'R256A'	S	1.65305
	KdP	0.000626954
	KSen	4.04761
	KAK	0.54128
	KdK	0.0106733
	alpha	1.92492
'R269L'	S	1.65305
	KdP	0.000626954
	KSen	94.5212
	KAK	0.54128
	KdK	0.0106733
	alpha	0.0634316
'S217W'	S	1.65305
	KdP	0.000626954
	KSen	70.2094
	KAK	0.54128
	KdK	0.0106733
	alpha	0.940471
'S217W_Gly7_260/261'	S	1.65305
	KdP	0.000626954
	KSen	143.464
	KAK	0.54128
	KdK	0.0106733
	alpha	1.001
'S217W_Gly7_219/220'	S	1.65305
	KdP	0.000626954
	KSen	66.5875
	KAK	0.54128
	KdK	0.0106733
	alpha	0.940471
'S43W'	S	1.65305
	KdP	0.000626954
	KSen	12.9068
	KAK	0.54128
	KdK	0.0106733
	alpha	0.940471
'V191W'	S	1.65305
	KdP	0.000626954
	KSen	53.727
	KAK	0.54128
	KdK	0.0106733
	alpha	0.940471
'Y265A'	S	1.65305
	KdP	0.000626954
	KSen	21.3279
	KAK	0.502729
	KdK	0.0106733
	alpha	1.08351
'Y265A_Gly7_270/271'	S	1.65305
	KdP	0.000626954
	KSen	21.3279
	KAK	0.669376
	KdK	0.0106733
	alpha	0.999
'Y265A_Gly7_219/220'	S	1.65305
	KdP	0.000626954
	KSen	26.8431
	KAK	1.36981
	KdK	0.0106733
	alpha	1.3955
'Y40W'	S	1.65305
	KdP	0.000626954
	KSen	46.3163
	KAK	0.54128
	KdK	0.0106733
	alpha	0.940471
'Y60C_1'	S	1.65305
	KdP	0.000626954
	KSen	21.3279
	KAK	0.54128
	KdK	0.0106733
	alpha	0.940471
'Y60C_2'	S	1.65305
	KdP	0.000626954
	KSen	21.3279
	KAK	0.54128
	KdK	0.0106733
	alpha	0.940471
'Y60C_3'	S	1.65305
	KdP	0.000626954
	KSen	21.3279
	KAK	0.54128
	KdK	0.0106733
	alpha	0.940471
'Y60C_4'	S	1.65305
	KdP	0.000626954
	KSen	21.3279
	KAK	0.54128
	KdK	0.0106733
	alpha	0.940471
'Y60C_5'	S	1.65305
	KdP	0.000626954
	KSen	21.3279
	KAK	0.54128
	KdK	0.0106733
	alpha	0.940471
'Y60C_6'	S	1.65305
	KdP	0.000626954
	KSen	21.3279
	KAK	0.54128
	KdK	0.0106733
	alpha	0.940471
'Y60C_7'	S	1.65305
	KdP	0.000626954
	KSen	21.3279
	KAK	0.54128
	KdK	0.0106733
	alpha	0.940471
'Y60C_8'	S	1.65305
	KdP	0.000626954
	KSen	21.3279
	KAK	0.54128
	KdK	0.0106733
	alpha	0.940471
'Y60C_9'	S	1.65305
	KdP	0.000626954
	KSen	21.3279
	KAK	0.54128
	KdK	0.0106733
	alpha	0.940471
'Y60C_Gly4_260/261_1'	S	1.65305
	KdP	0.000626954
	KSen	10.9944
	KAK	0.54128
	KdK	0.0106733
	alpha	1.001
'Y60C_Gly4_260/261_2'	S	1.65305
	KdP	0.000626954
	KSen	8.12229
	KAK	0.54128
	KdK	0.0106733
	alpha	1.001
'Y60C_Gly4_260/261_3'	S	1.65305
	KdP	0.000626954
	KSen	13.3139
	KAK	0.54128
	KdK	0.0106733
	alpha	1.001
'Y60C_Gly7_260/261_1'	S	1.65305
	KdP	0.000626954
	KSen	14.5868
	KAK	0.54128
	KdK	0.0106733
	alpha	1.001
'Y60C_Gly7_260/261_2'	S	1.65305
	KdP	0.000626954
	KSen	9.38156
	KAK	0.54128
	KdK	0.0106733
	alpha	1.001
'Y60C_Gly7_260/261_3'	S	1.65305
	KdP	0.000626954
	KSen	9.11559
	KAK	0.54128
	KdK	0.0106733
	alpha	1.001
'Y60C_Gly7_270/271_1'	S	1.65305
	KdP	0.000626954
	KSen	17.5803
	KAK	0.696463
	KdK	0.0106733
	alpha	0.999
'Y60C_Gly7_270/271_2'	S	1.65305
	KdP	0.000626954
	KSen	14.8597
	KAK	1.02602
	KdK	0.0106733
	alpha	0.999
'Y60C_Gly7_219/220_1'	S	1.65305
	KdP	0.000626954
	KSen	850.994
	KAK	0.54128
	KdK	0.0106733
	alpha	0.940471
'Y60C_Gly7_219/220_2'	S	1.65305
	KdP	0.000626954
	KSen	999.447
	KAK	0.54128
	KdK	0.0106733
	alpha	0.940471
